# Supplementary material for: Rise of the Earliest Tetrapods: An Early Devonian Origin from Marine Environment
Source: PLoS One. 2011 Jul 14;6(7):e22136. doi: 10.1371/journal.pone.0022136 (PMC3136505; doi:10.1371/journal.pone.0022136)
Supplement: Table S2 — Similar amino acid sites between the different groups of sarcopterygians which have been affected by positive-destabilizing during cladogenesis. (XLS) [file pone.0022136.s003.xls]

## Sheet: Sheet1
Similar amino acid sites between the different groups of sarcopterygians which have been affected by positive-destabilizing during cladogenesis
Abbreviations: aa site-amino acid site number, A- Amphibians, L- Lungfishes, C- Coelacanths, ATP6- Adenosine Triphosphate Synthase F0 subunit 6, COX2 - Cytochrome c Oxidase subunit 2, COX3 - Cytochrome c Oxidase subunit 3, CYTB - Cytochrome b, ND 1,2,3,4,4l,5,6 - NADH dehydrogenase 1,2,3,4,4l,5,6
The gene name are given in the left hand side in capital letters
Protiens Cytochrome c subunit 1 did not show any similar sites which probably happened due to its highly conservative nature. ATP synthase F0 subunit 8 also did not show similar sites owing to its small size and high rate of evolution.A site was considered to have positive selection if the Z- scores show by the program were higher than 3.09, it is also interesting to note that A-L-C is higher tha…
ATP6
aa site	A-L	A-C	L-C	A-L-C
1	pK'
9		pK'
10		pK'
11		pK'
12		pK'
13		pK'
14		pK'
36	Ra
37	Ra
38	Ra
39	Ra
40	Ra
41	Ra
42	Ra
43	Ra
44	Ra
105		pK'
106			pK'
107	pK'
108	pK'
109	pK'
110	pK'
111	pK'
112	pK'
113	pK'
114	pK'
115	pK'
186		pK'
187		pK'
188		pK'
COX2
83	pK'
84	pK'
85	pK'
86	pK'
87	pK'
88	pK'
89	pK'
90	pK'
91	pK'
92	pK'
93	pK'
94	pK'
95	pK'
96	pK'
165	pK'
205		an
206		an
207		an
209		an
210		an
214		an
216		an
217		an
218		an
219		an
220		an
COX3
13	pK'
14	pK'
15	pK'
16	pK'
19	Ra
20	Ra
21	Ra
22	Ra
23	Ra
24	Ra
25	Ra
26	Ra
27	Ra , pK'
28	Ra , pK'
29	Ra , pK'
30	Ra
31	Ra
32	Ra
33	Ra
34	Ra
35	Ra
36	Ra
37	Ra
38	Ra
39	Ra
213	pK'
214	pK'
215	pK'
216	pK'
217	pK'
219	pK'
CYTB
20	pK'
21	pK'
22	pK'
23	pK'
25	pK'
26	pK'
27	pK'
58	pK'
59	pK'
60	pK'
109	Ra
119	Ra
120	Ra
121	Ra
122	Ra
123	Ra
151	pK'
152	pK'
153	pK'
154	pK'
155	pK'
161	pK'
163	pK'
164	pK'
165	pK'
230	Ra
231	Ra
232	Ra
241	pK'
288		pK'
289		pK'
290		pK'
299		pK'
300		pK'
301		pK'
302		pK'
303			pK'
304			pK'
305		pK'
306		pK'
307		pK'
ND1
16	pK'
17	pK'
18	pK'
19	pK'
20	pK'
27	pK'
28	pK'
29	pK'
30	pK'
31	pK'
32	pK'
37	pK'
38	pK'
39	pK'
40	pK'
41	pK'
42	pK'
43	pK'
44	pK'
49	pK'
50	pK'
51	pK'
52	pK'
53	pK'
54	pK'
55	pK'
56	pK'
228	Ra
229	Ra
230	Ra
231	Ra
232	Ra
233	Ra
234	Ra
235	Ra
236	Ra
237	Ra
238	Ra
239	Ra
240	Ra	Ko
241	Ra
242	Ra
243	Ra
244	Ra	Ko
245	Ra , Hp		Ko
246	Ra , Hp			Ko
247	Hp			Ko
249	H , Ns ,Hp
250	H
251	H			an
252	H, Ko			an
253	H, Hp			an
254	Ko			an
255	Ko			an
256	Hp			an
257	Hp			an
258	Hp			an
259	Hp ,F			an
260	F, Ra, Pt			an
261	F, Ra, Pt			an
262	F, Ra			an
263	Pt			an
				an
266	F, Ht
267	F, Ht
268	F, Ht
269	F, Ht ,Pc
270	F, Ht
271	F, Ht
272	F, Ht
273	F, Ht
274	F, Ht
275	Ko
276	Ko
277	Ko
278	Ko , F
281	Ko
282	Ko , F
283	F
284	Ko , H, F
285	Ko , H, F ,Hp
286	F
287	F ,Hp
288	F, Ra
289	Ra
290	Pt
291	Pt
292	Pt , Ra
293	Pt
294	Pt
295	Pt , H
305	H
306	H
307	H
308	H
309	H
310	H
311	H
ND2
1	Ra
2	Ra
3	Ra
11	pK'
12	pK'
13	pK'
14	pK'
15	pK'
16	pK'
17	pK'
18	pK'
96	pK'
97	pK'
140	Ra
141	Ra
142	Ra
143	Ra
144	Ra
145	Ra
146	Ra
147	Ra
148	Ra
149	Ra
150	Ra
151	Ra
152	Ra
168		Hnc
174	F
175	F
176	F
177	F
198		F
199		F
200		F
201		F
202		F
203		F
204		F
206	Ko
207			Ko
208			Ko
209	Ko , Ht
210	Ko , Ht
211	Ko
212	Ra , Ht
213	Ra
214	Ra
215	Ra
216	Ra
217	Ra , P
218	Ra
219	Ra
220	Ra
221	Ra
222	Ra
223	Ra
224	Ra
225	Ra
226	Ra
337				an
338				an
339				an
ND3
1	P, Ra
2	P, Ra
3	P, Ra
4	P, Ra
5	P, Ra
6	P, Ra
7	P, Ra
8	P, Ra
9	P, Ra
10	Ra
11	Ra
12	Ra
13	Ra
14	Ra
15	Ra
16	Ra
29		P
30		P
31		P
32		P
34		P
39	Ra
40	Ra
41	Ra
43	Ra
44	Ra
45	Ra , Ko , F
46	Ra , Ko , F
47	Ra , Ko , F
48	Ra , Ko , F
49	Ra , Ko , F
50	Ra , Ko , F
51	Ra , Ko , F
52	Ra , Ko , F
53	Ra , Ko , F
54	Ra , Ko , F
55	Ra , Ko
56	Ra
57	Ra
58	Ra
59	Ra
60	Ra
61	Ra
62	Ra , Ko
63	Ko
64	Ko
79	Ko
80	F, Ko
81	F
82	F
83	F
84	F
85	F
86	F
87	F
88	F
89	F
90	F
94		pHi
111	Ko, an , Hp
112	Ko, an , Hp
113	Ko
ND4
1	Ra
2	Ra
3	Ra
4	Ra
5			Ra
6		Ra
7		Ra
8		Ra
9		Ra
10		Ra		Br
11		Ra		Br , pHi
12		Ra		Br , pHi , H
13			Ra , H	Br , pHi
14		P	Ra	Br
15			Ra	H
16		P	Ra	H
17		P	Ra
18		P	Ra
19		Ra , P		pHi
20		Ra		pHi
21		Ra
22		Ra
23		Ra
24		Ra
87	Ko
88	Ko
90	Ko
92		P
93	Ko	P
94		P
95		P
96		P
97		P
98		Ht
99	F
100	F	Ht
101	F
102	F, Ra
130	Ko
141	pHi
142	pHi
166	Ko
167	Ko
168	Ko
218	pK'
219	pK'
220	pK'
221	pK'
222	pK'
223	pK'
224	pK'
231	pK'
248	F
249	F
250	F
251	F
264		Hp, an
265		Hp, an
266		Hp, an
267		Hp, an
268		Hp, an
269		Hp, an
270		Hp
271		Hp
272	Ra
273	Ra
275	Ra
276	Ra
277	Ra
278	Ra
279	Ra
280	Ra
281	Ra
282	Ra
283	Ra
284	Ra
285	Ra
294	Ht
295	Ht
296	Ht
297	Ht
298	Ht
299	Ko , Ht
300	Ko , Ht
301	Ko , Ht
302	Ko , Ht
303	Ht
304	Ht
305	Ht
306	Ht
307	Ht
308	Ko
309	Ko , Ht
353				F
354				F
358	Ko
359	Ko
360	Ko
361	Ko
362	Ko
365				F
366				F
367				F
369	Ko
370	Ko
371	Ko
372	Ko
374	F
375	F
376	F
377	F
378	F
402	F
403	F
407	F
408	F
409	F
ND4L
36	Ra, Pt
37	Ra, Pt
38	Ra, Pt
42	Ra, Pt
57				P
58	Ko			P
59	Ko			P
61	Ko
62	Ko
80	Br
81	Br
82	P
83	P
84	P
85	P
86	P
ND5
15		F
16		F
17	Br	F
18	Br	F
19	Br
20	Br	F, Ra
21	Br	F, Ra
22	Br
23	Br
24	Br	Ra
25	Br	Ra
26	Br	Ra
27	Br	Ra
28	Br
29	Br
30	Br
31	Br
32	Br
33	Br
34	Br
86	pK'
87	pK'
104	pHi
105	pHi
106	pHi
107	pHi
108	pHi
109	pHi
110	pHi
111	pHi
112	pHi
113	pHi
114	pHi
115	pHi
116	pHi
122	pHi
123	pHi
150		Pa
151		Pa
163	pK'
164	pK'
165	pK'
166	pK'
167	pK'
414		pK'
481	Ra
544	pK'
ND6
8	pK'
9	pK'
10	pK'
11	pK'
12	pK'
94	Hp
122	Ca
141	pK'
142		pK'
143		pK'
144			pK'
145			pK'
146			pK'
147		pK'
148		pK'
149		pK'

## Sheet: Sheet2
pK'
pK'
pK'
pK'
pK'
pK'
